# Supplementary material for: CD44/PI3K/NF-κB/AHR is a Novel Signaling Pathway Mediating Breast Tumor Progression
Source: Research Square preprint supplement (doi:10.21203/rs.3.rs-4262195/v1), 2024-05-09
Supplement: Supplementary file 1 [file d7ba6f2b093e134361036b3f.docx]

**Cancer modeling:**

( MCF7, SKBR, ZR75, MDA468, MDA231)

| CD44 (80-100 KDa) | 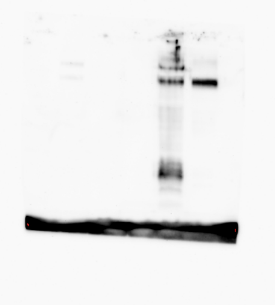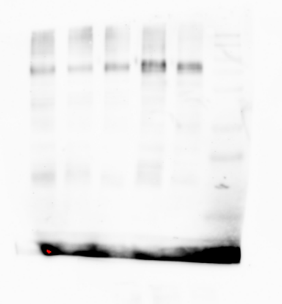 |
| --- | --- |
| AHR (100- 110 KDa) | 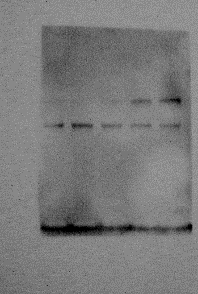 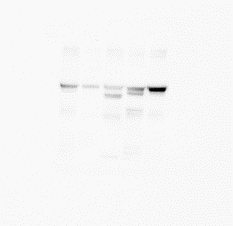 |
| Alpha-tubulin (52 KDa) |  |

**Si-RNA:**

**(Scrambled, SiRNACD44, SiRNAAhR)**

| CD44 (80-100 KDa) | 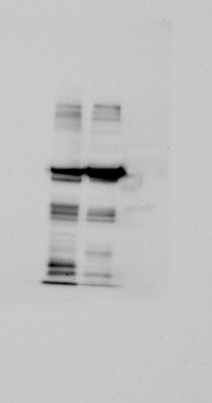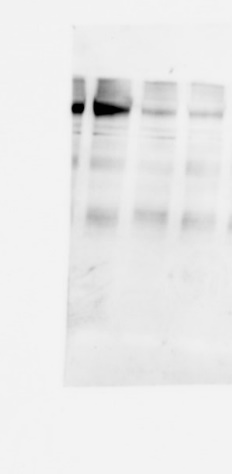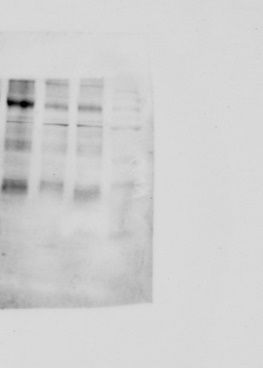 |
| --- | --- |
| AHR (100- 110 KDa) | 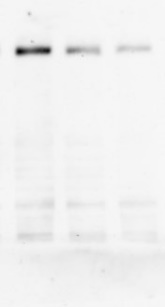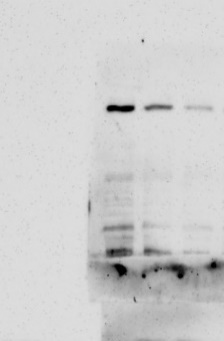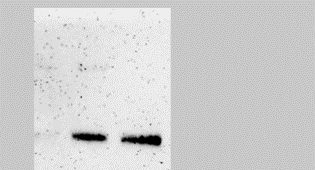 |
| Alpha-tubulin (52 KDa) | 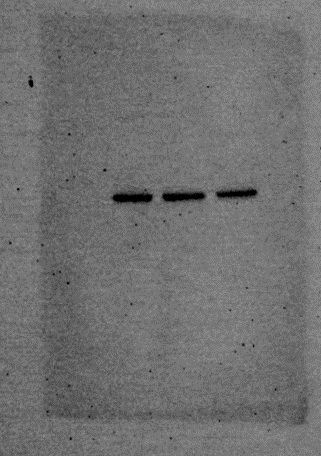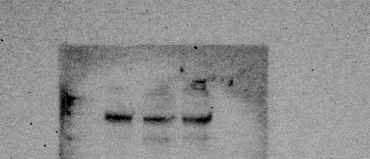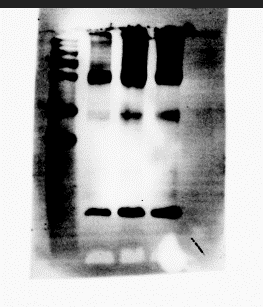 |
